# Supplementary material
Source: HighWire-hosted journal article supplement (https://rapm.bmj.com/highwire/filestream/21713/field_highwire_adjunct_files/4/rapm-2022-104236supp005_data_supplement.pdf)
Supplement: rapm-2022-104236supp005_data_supplement.pdf [file rapm-2022-104236supp005_data_supplement.pdf]

Supplemental Table 5. Full Cox and Logistic Model Results of Safety Events Adjusting for Patient Characteristics, Matched Cohort

| Independent Variables         | Rate of post-operative complication |         | Risk of a short-term life-threatening event |         |
|-------------------------------|-------------------------------------|---------|---------------------------------------------|---------|
|                               | HR (LCL, UCL)                       | p value | OR (LCL, UCL)                               | p value |
| ISD (vs MILD)                 | 1.04 (0.83, 1.30)                   | 0.747   | 0.83 (0.52, 1.33)                           | 0.433   |
| Age group: 50-64 (reference)  |                                     |         |                                             |         |
| 65-69                         | 0.80 (0.51, 1.25)                   | 0.325   | 1.16 (0.44, 3.02)                           | 0.766   |
| 70-74                         | 0.77 (0.49, 1.20)                   | 0.246   | 0.75 (0.28, 2.05)                           | 0.581   |
| 75-79                         | 0.80 (0.51, 1.25)                   | 0.326   | 0.72 (0.26, 1.97)                           | 0.520   |
| 80-84                         | 0.74 (0.46, 1.20)                   | 0.229   | 1.02 (0.37, 2.81)                           | 0.973   |
| >=85                          | 1.13 (0.68, 1.88)                   | 0.639   | 1.40 (0.48, 4.10)                           | 0.544   |
| Male (vs Female)              | 1.04 (0.82, 1.32)                   | 0.718   | 1.60 (0.98, 2.62)                           | 0.061   |
| Race: Caucasian (reference)   |                                     |         |                                             |         |
| Black                         | 1.24 (0.75, 2.07)                   | 0.396   | 1.29 (0.45, 3.72)                           | 0.632   |
| Region: Midwest (reference)   | 1.00 (0.00, 0.00)                   |         | 1.00 (0.00, 0.00)                           |         |
| Northeast                     | 1.25 (0.85, 1.86)                   | 0.262   | 0.49 (0.17, 1.42)                           | 0.188   |
| South                         | 1.01 (0.77, 1.33)                   | 0.936   | 0.91 (0.54, 1.53)                           | 0.716   |
| West                          | 1.13 (0.78, 1.65)                   | 0.510   | 0.75 (0.33, 1.68)                           | 0.486   |
| Index year: 2017 (reference)  |                                     |         |                                             |         |
| 2018                          | 0.78 (0.50, 1.22)                   | 0.280   | 0.28 (0.10, 0.83)                           | 0.021   |
| 2019                          | 0.92 (0.60, 1.39)                   | 0.680   | 0.39 (0.17, 0.90)                           | 0.028   |
| 2020                          | 0.61 (0.39, 0.96)                   | 0.033   | 0.51 (0.23, 1.14)                           | 0.100   |
| 2021                          | 0.32 (0.15, 0.70)                   | 0.004   | 0.27 (0.10, 0.74)                           | 0.011   |
| Charlson Comorbidity Index    | 1.10 (1.01, 1.19)                   | 0.032   | 1.18 (1.02, 1.37)                           | 0.029   |
| Asthma (vs no)                | 0.83 (0.55, 1.25)                   | 0.370   | 1.05 (0.49, 2.28)                           | 0.897   |
| Back syndrome                 | 1.08 (0.65, 1.79)                   | 0.776   | 1.72 (0.72, 4.09)                           | 0.219   |
| COPD                          | 1.09 (0.78, 1.51)                   | 0.617   | 1.25 (0.67, 2.34)                           | 0.480   |
| Diabetes                      | 1.25 (0.94, 1.66)                   | 0.119   | 1.24 (0.70, 2.18)                           | 0.464   |
| Diabetic neuropathy           | 1.19 (0.78, 1.83)                   | 0.419   | 1.05 (0.45, 2.44)                           | 0.910   |
| Intervertebral disc disorders | 0.98 (0.76, 1.26)                   | 0.881   | 1.07 (0.64, 1.79)                           | 0.792   |
| Heart failure                 | 0.82 (0.54, 1.24)                   | 0.335   | 1.22 (0.60, 2.51)                           | 0.584   |
| Hypertension                  | 0.84 (0.65, 1.09)                   | 0.182   | 1.08 (0.62, 1.86)                           | 0.787   |

|                                           |                   |        |                   |       |
|-------------------------------------------|-------------------|--------|-------------------|-------|
| Obesity                                   | 1.31 (0.96, 1.78) | 0.093  | 0.73 (0.37, 1.45) | 0.369 |
| Osteoarthritis                            | 0.95 (0.74, 1.22) | 0.711  | 0.94 (0.56, 1.57) | 0.813 |
| Osteoporosis                              | 1.70 (1.23, 2.34) | 0.001  | 1.50 (0.74, 3.02) | 0.260 |
| Closed lumbar, vertebral, or hip fracture | 5.03 (3.17, 7.98) | <0.001 | 1.00 (1.00, 1.00) | 1.000 |
| Spondylolisthesis in other regions        | 1.03 (0.54, 1.96) | 0.921  | 0.77 (0.18, 3.23) | 0.719 |
| Lumbar spondylolisthesis                  | 0.98 (0.68, 1.41) | 0.920  | 1.52 (0.78, 2.98) | 0.218 |
| Vascular claudication                     | 1.41 (0.66, 3.02) | 0.372  | 1.70 (0.51, 5.71) | 0.388 |

COPD, chronic obstructive pulmonary disease; HR, hazard ratio; ISD, interspinous spacer; LCL, lower confidence limit; MILD, minimally invasive lumbar decompression; OR, odds ratio; UCL, upper confidence limit
